# Supplementary material
Source: Springer Nature journal article supplement (https://www.springermedizin.de/resource/supplementary/13054_2004_9238_MOESM1_ESM.pdf/9719280)
Supplement: MOESM1 [file 9719280]

All Mechanically Ventilated (MV) Patients

January 1997 – June 1999,  $n = 1451$

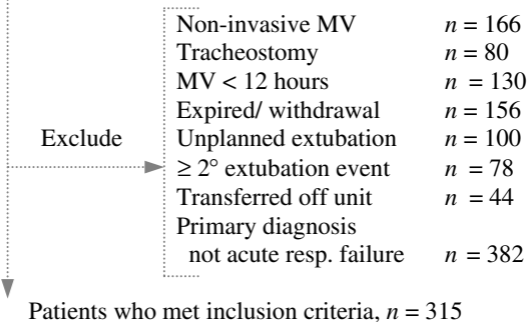

Successful Extubation  
 $n = 252$

Failed Extubation  
 $n = 63$

Random selection  
 $n = 100$

7 not available

3 not available

Control cohort  $n = 93$

Study cohort  $n = 60$
